# Supplementary material for: Copper(ii) complex formation with a linear peptide encompassing the putative cell binding site of angiogenin
Source: Royal Society of Chemistry journal article supplement (doi:10.1039/c0dt00732c), 2010-01-01
Supplement: c0dt00732c.pdf [file c0dt00732c.pdf]

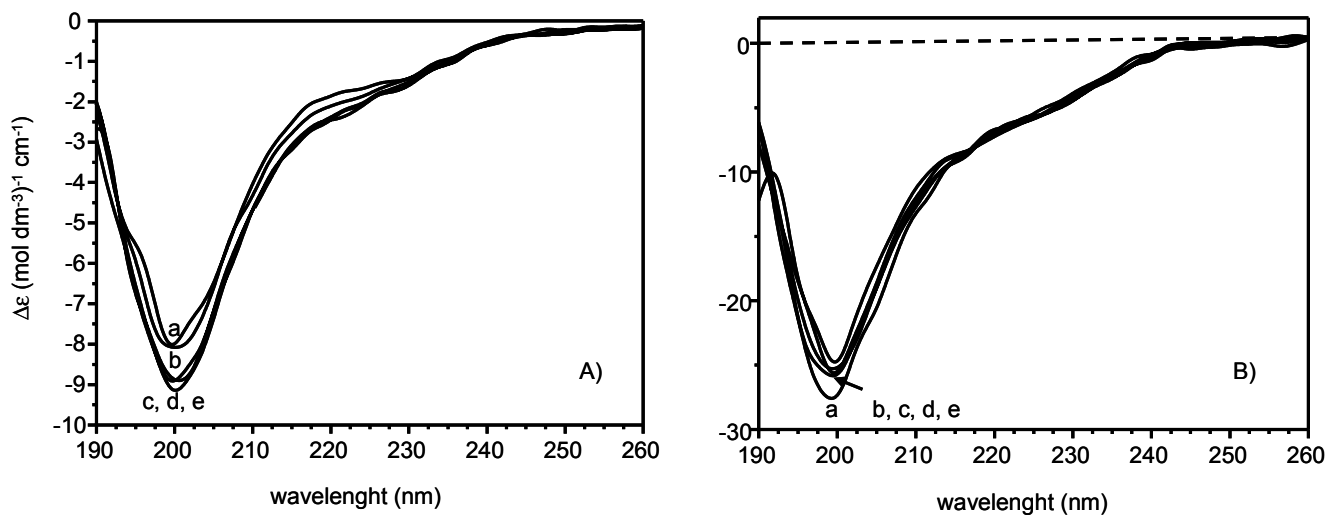

CD spectra of A) Ac-PHREN-NH<sub>2</sub> B) Ac-KNGNPHREN-NH<sub>2</sub> system, recorded in H<sub>2</sub>O with  $c(L) = 2 \times 10^{-5} \text{ mol dm}^{-3}$  at different pH values a) pH= 4; b) pH=6; c) pH=7; d) pH=8; e) pH=9.
